# Supplementary material for: Using reaction time and co-contraction to differentiate acquired (secondary) from functional ‘fixed’ dystonia
Source: PubMed Central journal article supplement (PMC4516003; doi:10.1136/jnnp-2014-309040), 2014-11-28
Supplement: jnnp-2014-309040-s1.pdf [file jnnp-2014-309040-s1.pdf]

**e-Table 1A Clinical and demographic characteristics of patients with fixed dystonia**

| Onset age | Disease Duration (years) | Mode of onset | Preceding event                                        | Findings                                                              | The Burke-Fahn-Marsden rating score for dystonia-Movement section* | Comorbidities                                                             | Response to botulinum toxin              |
|-----------|--------------------------|---------------|--------------------------------------------------------|-----------------------------------------------------------------------|--------------------------------------------------------------------|---------------------------------------------------------------------------|------------------------------------------|
| 30        | 11                       | Acute         | Pelvic surgery                                         | Both feet in turned and plantar flexed                                | 18                                                                 | Joint hypermobility, urinary dysfunction, menstrual irregularity, anxiety | Immediate with partial remission         |
| 24        | 6                        | Acute         | Hip surgery and fall during recovery                   | Right hip internal rotation with plantar flexed and inversion at foot | 8                                                                  | Joint hypermobility, urinary dysfunction, menstrual irregularity, anxiety | Immediate with partial remission         |
| 32        | 8                        | Acute         | Right Foot injury                                      | Right foot inversion and plantar flexion                              | 7                                                                  | Hypermobility, urinary dysfunction, depression                            | Immediate with partial remission         |
| 36        | 10                       | Acute         | Long standing right sesmoid bone fracture, immobilized | Right foot inversion and plantar flexion                              | 8                                                                  | Panic disorder                                                            | Immediate with partial remission         |
| 45        | 1                        | Acute         | Left foot injury                                       | Left foot inversion                                                   | 7                                                                  | Urinary dysfunction                                                       | Immediate with partial remission         |
| 38        | 4                        | Acute         | Left foot trauma                                       | Left foot plantar flexion and slight eversion                         | 7                                                                  | None                                                                      | Not injected till the time of evaluation |
| 46        | 1                        | Acute         | Right foot injury                                      | Right foot plantar flexion and inversion                              | 9                                                                  | None                                                                      | Not injected till the time of evaluation |
| 35        | 14                       | Acute         | Pelvic surgery                                         | Fixed posture of right hand and right leg                             | 8                                                                  | Migraine, fibromyalgia and restless leg syndrome                          | Immediate with partial remission         |
| 38        | 6                        | Acute         | Right foot injury                                      | Right foot plantar flexion and inversion                              | 9                                                                  | None                                                                      | Immediate with partial remission         |

(\*Reference Burke RE et al. Neurology. 1985;35:73-77)

**e-Table 1B Clinical and demographic characteristics of patients with acquired dystonia**

| Onset age (years) | Disease Duration (years) | Mode of onset | Preceding event                                                | Findings                                                                                                             | The Burke-Fahn-Marsden rating score for dystonia-Movement section* | Comorbidities | Response to botulinum toxin |
|-------------------|--------------------------|---------------|----------------------------------------------------------------|----------------------------------------------------------------------------------------------------------------------|--------------------------------------------------------------------|---------------|-----------------------------|
| 15                | 9                        | Progressive   | Stroke<br>(lesion in the right lentiform nucleus)              | Left hand dystonia                                                                                                   | 8                                                                  | None          | Poor                        |
| Birth             | 66                       | Progressive   | Cerebral Paralysis                                             | Left hemi dystonia                                                                                                   | 16                                                                 | None          | No response                 |
| 14                | 4                        | Progressive   | Stroke (lesion in the left lentiform nucleus)                  | Right foot dystonia                                                                                                  | 7                                                                  | None          | Poor                        |
| 54                | 4                        | Progressive   | Significant cervical canal stenosis with 2 level decompression | Dystonic posturing affecting the right arm, particularly the hand. Some abnormal posturing present in the right leg. | 8                                                                  | None          | Poor                        |
| Birth             | 57                       | Progressive   | Cerebral Paralysis                                             | Right hemidystonia                                                                                                   | 12                                                                 | None          | Poor                        |
| 1                 | 43                       | Progressive   | Encephalitic illness                                           | Right hemidystonia                                                                                                   | 12                                                                 | None          | Poor                        |
| 39                | 27                       | Progressive   | lumbar surgery to “remove a spur”                              | Left foot dystonia                                                                                                   | 7                                                                  | None          | Poor                        |
| Birth             | 22                       | Progressive   | Left cerebellar hypoplasia                                     | Left hemidystonia                                                                                                    | 12                                                                 | None          | Poor                        |
| Birth             | 21                       | Progressive   | Cerebral Paralysis                                             | Left hemidystonia                                                                                                    | 14                                                                 | None          | Good                        |

(\*Reference Burke RE et al. Neurology. 1985;35:73-77)
